# Supplementary material for: RpoS-Regulated Genes and Phenotypes in the Phytopathogenic Bacterium Pectobacterium atrosepticum
Source: MDPI journal article supplement (doi:10.3390/ijms242417348), 2023-12-11
Supplement: s1 [file s1]

**Table S3.** Bacterial strains, plasmids and primers used in this study.

| Name                                                              |  | Description                                                                                                                                                         | Origin     |
|-------------------------------------------------------------------|--|---------------------------------------------------------------------------------------------------------------------------------------------------------------------|------------|
| Strain                                                            |  |                                                                                                                                                                     |            |
| Pectobacterium atrosepticum SCRI1043                              |  | Wild type                                                                                                                                                           | [110]      |
| Pectobacterium atrosepticum SCRI1043 ΔrpoS                        |  | Mutant strain of SCRI1043 containing the kanamycin cassette in the chromosome; Km <sup>R</sup>                                                                      | This study |
| Pectobacterium atrosepticum SCRI1043 ΔrpoS complementation mutant |  | Mutant strain of SCRI1043 containing the kanamycin cassette in the chromosome and the rpoS complementation construct on pGEM:rpoS; Km <sup>R</sup> Amp <sup>R</sup> | This study |
| Escherichia coli cc118                                            |  | Host for suicidal vector pKNG101; Δ(ara, leu) araD ΔlacX 74 galE galK PhoA20 thi-1 rpsE rpoB argE (am) recA1, Sm <sup>R</sup>                                       | [111]      |
| Escherichia coli HH26/pNJ5000                                     |  | Mobilizing strain for conjugative transfer of the suicide vector pKNG101 into P. atrosepticum cells; tra+; Tet <sup>R</sup>                                         | [112]      |
| Escherichia coli NovaBlue                                         |  | endA lhdR17 (rK12–mK12+) supE44 thi-1 recA1 gyrA96 relA1 lacF' [proA+ B+ lacIqZ ΔM15::Tn10 (Tet <sup>R</sup> )]                                                     | Novagen    |
| Plasmids                                                          |  |                                                                                                                                                                     |            |
| pGEM-T Easy                                                       |  | Linearized vector for cloning; fl ori Amp <sup>R</sup> lacZ                                                                                                         | Promega    |
| pGEM:rpoS                                                         |  | fl ori Amp <sup>R</sup> lacZ rpoS                                                                                                                                   | This study |
| pGEM:ΔrpoS;Km <sup>R</sup>                                        |  | fl ori Amp <sup>R</sup> lacZ Km <sup>R</sup>                                                                                                                        | This study |
| pKD4                                                              |  | Matrix for PCR amplification of kanamycin resistance cassette; oriRy rgnB bla Km <sup>R</sup>                                                                       | [113]      |
| pKNG101                                                           |  | Suicide mobilized vector for inactivation of target genes; pir-ori R6K mobRK2 sacB Sm <sup>R</sup>                                                                  | [97]       |
| pKNG101:ΔrpoS;Km <sup>R</sup>                                     |  | Suicide plasmid carrying mutant locus ΔrpoS;Km <sup>R</sup> ; Km <sup>R</sup> Sm <sup>R</sup> sacB                                                                  | This study |
| pGEM:rpoS; complementation construct                              |  | fl ori Amp <sup>R</sup> lacZ rpoS                                                                                                                                   | This study |
| Primers                                                           |  |                                                                                                                                                                     |            |
| Primer name                                                       |  | Primer sequence 5'–3'                                                                                                                                               |            |
| Primers for mutagenesis                                           |  |                                                                                                                                                                     |            |
| up rpoS F                                                         |  | TGGCAACAACGCTTCTGGTG                                                                                                                                                |            |
| dn rpoS R                                                         |  | GAACTGAATGAAATCAAGGCGGAG                                                                                                                                            |            |

|                                              |                                        |
|----------------------------------------------|----------------------------------------|
| <b>dn</b> <i>rpoS</i> KmF                    | CCCATGTCAGCCGTTAAGACGCTGGAAGATGTGGGTCG |
| <b>up</b> <i>rpoS</i> KmR                    | CCAGCCTACACAATCGATGGGACATCGCCACGC      |
| <b>Km</b> <i>rpoS</i> F                      | GCGATGTCCCATCGATTGTGTAGGCTGGAGCTGCTTC  |
| <b>Km</b> <i>rpoS</i> R                      | ATCTTCCAGCGTCTTAACGGCTGACATGGGAATTAGC  |
| <b>Check</b> <i>rpoS</i> F                   | CGTATAGCCTGAATGTCGGGCAATC              |
| <b>Check</b> <i>rpoS</i> R                   | GCCATCAACTGGTTGCGTTGC                  |
| <b>T7F</b>                                   | TAATACGACTCACTATAGGG                   |
| <b>Sp6R</b>                                  | TAAATCCACTGTGATATCTTA                  |
| <b>Primers for complementation construct</b> |                                        |
| <b>Comp</b> <i>rpoS</i> F                    | CGATACGATGCTAGTCCGTGAGC                |
| <b>Comp</b> <i>rpoS</i> R                    | CTGGCGAATATCATACGCTAATCG               |
| <b>Primers for qRT-PCR</b>                   |                                        |
| <i>rpoS</i> F                                | CTATTTGGGAGAGATTGGCTATTTCG             |
| <i>rpoS</i> R                                | CCAGACCACGATTGTTGTAACGGC               |
| <i>rpoD</i> F                                | CTAATGCGGAAGAAGACATTGCCCC              |
| <i>rpoD</i> R                                | CTTCTCACGCGCCAGTTCAGGATCG              |
| <i>Ffh</i> F                                 | GTGGCATCATCCCTTTCATACCGC               |
| <i>Ffh</i> R                                 | CGATTCAAGAACGTGCTAAACCAGAG             |
| <i>recA</i> F                                | GTGGATATTGATGCCTTCGCCG                 |
| <i>recA</i> R                                | GTTTTATGCCTCTGTTCGTTTGGATATTC          |
| <i>ECA0603 cfa6</i> F                        | CGTGGTCGGGCATTCTGTAG                   |
| <i>ECA0603 cfa6</i> R                        | CGGCGTAACATCTTCAACGG                   |
| <i>ECA0609 cfl</i> F                         | CACAGACGAAATCGCATCTATATTTTAC           |
| <i>ECA0609 cfl</i> R                         | CTGGCTTATCACCATCTGATTTGTG              |
| <i>ECA4106 pck</i> F                         | CTCGGCAAACGTCGGCG                      |
| <i>ECA4106 pck</i> R                         | CTTGATGGTTTTGGCGTAGCAG                 |
| <i>ECA3517 trxC</i> F                        | CTTGGTGCGGTCCCTGCG                     |
| <i>ECA3517 trxC</i> R                        | CGGTTTCGGCTTCGGTATTGAC                 |
| <i>ECA1700 flgM</i> F                        | CAATGTCCTGCGTGCCTGG                    |
| <i>ECA1700 flgM</i> R                        | GCACACAGTCACTGAAGCCG                   |
| <i>ECA3238 iscR</i> F                        | CTCATCCAGCGTGATGTTATTCAGG              |
| <i>ECA3238 iscR</i> R                        | CTGTTGGTATGGTTATTTCTGCCGTC             |
| <i>ECA3882 dnaK</i> F                        | CAGCACCAATGGCAACGG                     |
| <i>ECA3882 dnaK</i> R                        | GAAACTGGAATCACTGGTAGAAGAGC             |
| <i>ECA3014 treC</i> F                        | GGTCTGTGGATTTTGGGCGG                   |
| <i>ECA3014 treC</i> R                        | GGGCTGAAATACATCCTGACTGAAC              |
| <i>ECA2112 hrpW</i> F                        | CTGAGCACTGCTGTTAGTGATTTC               |
| <i>ECA2112 hrpW</i> R                        | CTGAAAAACGTGGTGTTTGG                   |
| <i>ECA2767 dps</i> F                         | CTGGAACATGCGTGGCG                      |
| <i>ECA2767 dps</i> R                         | CAGCGACGTTTGTTTACCCAC                  |
| <i>ECA2180 uvrD</i> F                        | GCTTCAAGAGGAGATCTCTACATACAT            |
| <i>ECA2180 uvrD</i> R                        | GGAAGAGCGGCGTAAGTTTT                   |
| <i>ECA3430</i> F                             | CTGGGCAAGACATACAGTGAAGGTAAG            |
| <i>ECA3430</i> R                             | CGCTCGGATGTAGCCTGC                     |
| <i>ECA3441</i> F                             | GAAAGCGGCTAAAGCTGAGATTGCC              |
| <i>ECA3441</i> R                             | CATGAAGGGCAGCAAAATCGTC                 |
| <i>ECA4067 pelA</i> F                        | CTGCTCGCAGCCCAACCG                     |
| <i>ECA4067 pelA</i> R                        | GACGACTTTACCGCTTGAATC                  |
| <i>ECA4068 pelB</i> F                        | CACGCCAGACAATGACACGAC                  |
| <i>ECA4068 pelB</i> R                        | GCATGAACCAGACCACCACGC                  |
